# Supplementary material
Source: publisher site journal article supplement (https://www.dovepress.com/article/347425)
Supplement: Supplementary file 1 [file get_supplementary_file.php]

Supplementary Figure 1

Learning Curves

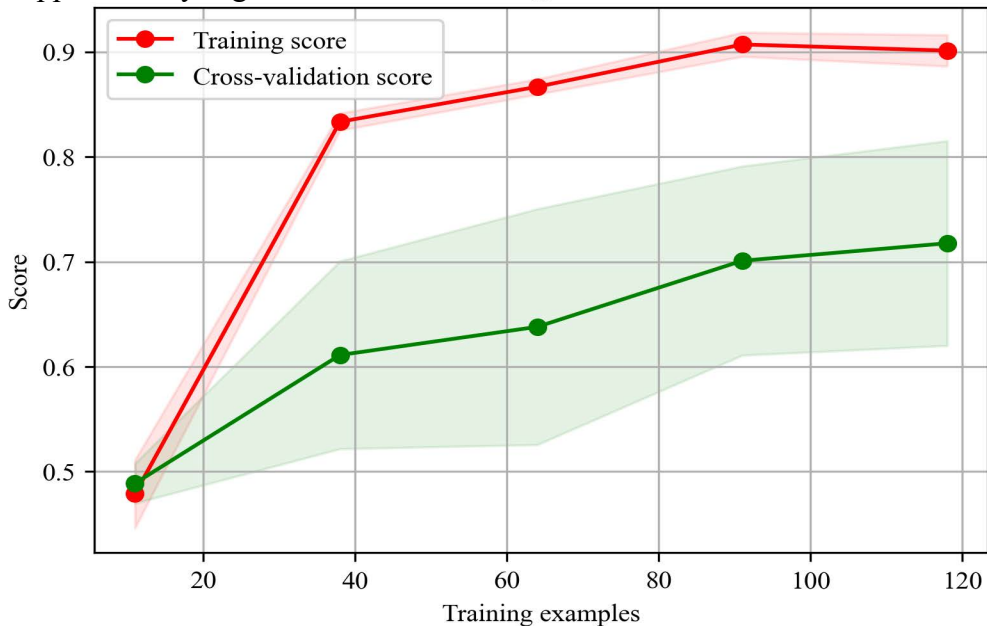

Supplementary Figure 1: the learning curve of the final prediction model

Supplementary Table 1 Sensitivity analysis after missing value manipulation

| Variable                                                                 | Total (n=364)            | After manipulation<br>(n=182) | Before manipulation<br>(n=182) | Statistical<br>magnitude | <i>P</i>  |
|--------------------------------------------------------------------------|--------------------------|-------------------------------|--------------------------------|--------------------------|-----------|
| Blood loss during the<br>operation, M (Q <sub>1</sub> , Q <sub>3</sub> ) | 80.00<br>(50.00, 100.00) | 80.00<br>(50.00, 100.00)      | 65.00<br>(50.00, 100.00)       | Z=-0.176                 | 0.8<br>61 |
